# Supplementary material
Source: PubMed Central journal article supplement (PMC3062695)
Supplement: NIHMS267093-supplement-01.pdf [file NIHMS267093-supplement-01.pdf]

**Supplementary Table 1. Experiment 1 fMRI ANOVA Effects**

| Structure                    | Coordinates |       |       | <i>F</i> | Volume<br>(mm <sup>3</sup> ) | Direction* |
|------------------------------|-------------|-------|-------|----------|------------------------------|------------|
|                              | RL          | AP    | IS    |          |                              |            |
| <i>Novelty</i>               |             |       |       |          |                              |            |
| Left Amygdala/Hippocampus    | 21.4        | 11.1  | -10.9 | 13.23    | 768                          | N > R      |
| Right Amygdala               | -15.8       | 3.1   | -9.6  | 12.93    | 582                          | N > R      |
| Right Parahippocampal Gyrus  | -13.8       | 25.2  | -6.6  | 12.18    | 415                          | N > R      |
| Right Cuneus                 | -21.5       | 87.6  | 18.4  | 12.77    | 378                          | N > R      |
| Right Hippocampus            | -18.7       | 15.2  | -12.6 | 12.55    | 326                          | N > R      |
| Right Fusiform Gyrus         | -28.1       | 40.8  | -12.6 | 12.08    | 299                          | N > R      |
| Right Middle Occipital Gyrus | -29.8       | 87.8  | 4.6   | 13.42    | 277                          | N > R      |
| Right Inferior Frontal Gyrus | -51.0       | -32.7 | 10.4  | 14.62    | 268                          | N > R      |
| Left Parahippocampal Gyrus   | 27.6        | 8.1   | -25.0 | 13.77    | 259                          | N > R      |
| <i>Valence</i>               |             |       |       |          |                              |            |
| Right Middle Occipital Gyrus | -27.6       | 83.2  | 7.7   | 13.38    | 3996                         | E > N      |
| Left Middle Occipital Gyrus  | 26.5        | 85.9  | 19.4  | 12.88    | 2347                         | E > N      |
| Left Fusiform Gyrus          | 25.5        | 60.1  | -13.1 | 12.02    | 1334                         | E > N      |
| <i>Interaction</i>           |             |       |       |          |                              |            |
| Bilateral Cuneus             | -2.2        | 76.9  | 6.8   | 13.74    | 257                          |            |

\*Abbreviations: N = novel; R = Repeated; E = emotional; N = neutral.

**Supplementary Table 2. Experiment 2 fMRI ANOVA Effects**

| Structure                           | Coordinates |       |       | <i>F</i> | Volume<br>(mm <sup>3</sup> ) | Direction* |
|-------------------------------------|-------------|-------|-------|----------|------------------------------|------------|
|                                     | RL          | AP    | IS    |          |                              |            |
| <i>Novelty</i>                      |             |       |       |          |                              |            |
| Right Lingual Gyrus                 | -16.1       | 71.2  | -1.9  | 15.16    | 4726                         | N > R      |
| Left Fusiform Gyrus                 | 27.0        | 70.9  | -12.5 | 12.23    | 1148                         | N > R      |
| Left Middle Occipital Gyrus         | 36.4        | 82.2  | 1.9   | 12.68    | 1014                         | N > R      |
| Right Cuneus                        | -20.1       | 86.3  | 22.3  | 11.62    | 906                          | N > R      |
| Right Precuneus                     | -0.2        | 62.8  | 58.8  | 11.99    | 900                          | R > N      |
| Left Middle Occipital Gyrus         | 11.5        | 88.8  | 13.7  | 12.29    | 650                          | N > R      |
| Left Middle Frontal Gyrus           | 41.1        | -52.4 | -1.4  | 14.00    | 576                          | R > N      |
| Right Middle Occipital Gyrus        | -42.7       | 73.9  | 17.3  | 12.31    | 311                          | N > R      |
| Right Inferior Parietal Lobule      | -44.0       | 49.2  | 47.8  | 10.99    | 261                          | R > N      |
| Left Precuneus                      | 2.8         | 68.0  | 38.4  | 11.32    | 231                          | R > N      |
| <i>Human</i>                        |             |       |       |          |                              |            |
| Right Occipitotemporal Sulcus (PPA) | -22.1       | 51.3  | -10.9 | 15.21    | 6261                         | S > H      |
| Right Middle Temporal Gyrus         | -46.6       | 65.3  | 2.3   | 15.13    | 1779                         | H > S      |
| Right Superior Occipital Gyrus      | -30.9       | 78.6  | 25.6  | 14.01    | 1742                         | S > H      |
| Right Calcarine Gyrus               | -14.5       | 79.3  | 3.9   | 15.76    | 1359                         | S > H      |
| Left Calcarine Gyrus                | 11.8        | 88.7  | 0.8   | 14.22    | 1288                         | S > H      |
| Left Fusiform Gyrus (PPA)           | 23.8        | 43.4  | -10.8 | 12.34    | 1129                         | S > H      |
| Left Lingual Gyrus                  | 20.9        | 70.4  | -10.6 | 13.54    | 966                          | S > H      |
| Right Fusiform (FFA)                | -39.2       | 49.7  | -16.0 | 13.07    | 918                          | H > S      |
| Left Middle Temporal Gyrus          | 52.8        | 64.7  | 5.5   | 14.96    | 665                          | H > S      |
| Left Superior Temporal Gyrus        | 56.5        | 55.3  | 20.6  | 12.81    | 496                          | H > S      |
| Left Middle Occipital Gyrus         | 30.5        | 86.6  | 16.0  | 11.50    | 495                          | S > H      |
| Left Superior Frontal Gyrus         | 12.6        | 4.5   | 71.2  | 13.19    | 415                          | H > S      |
| <i>Interaction</i>                  |             |       |       |          |                              |            |
| Bilateral Thalamus/Left Caudate     | 1.9         | 5.4   | 10.7  | 12.59    | 1341                         |            |
| Right Caudate                       | -8          | -11   | 6     | 13.18    | 367                          |            |

\*Abbreviations: N = novel; R = repeated; H = human; R = repeated; PPA = parahippocampal place area; FFA = fusiform face area.

### Supplementary Table 3. IAPS Normative Ratings

| Description                    | Slide<br>Number | Valence | Arousal |
|--------------------------------|-----------------|---------|---------|
| <i>Experiment 1: Emotional</i> |                 |         |         |
| Mutilation                     | 3000            | 1.45    | 7.26    |
| Mutilation                     | 3010            | 1.71    | 7.16    |
| BurnVictim                     | 3053            | 1.31    | 6.91    |
| Mutilation                     | 3060            | 1.79    | 7.12    |
| Mutilation                     | 3130            | 1.58    | 6.97    |
| <i>Experiment 1: Neutral</i>   |                 |         |         |
| Man                            | 2190            | 4.83    | 2.41    |
| NeutFace                       | 2200            | 4.79    | 3.18    |
| Woman                          | 2305            | 5.41    | 3.63    |
| NeutralMale                    | 2493            | 4.82    | 3.34    |
| Man                            | 2512            | 4.86    | 3.46    |
| <i>Experiment 2: Human</i>     |                 |         |         |
| Woman                          | 2305            | 5.41    | 3.63    |
| Man                            | 2190            | 4.83    | 2.41    |
| NeutFace                       | 2200            | 4.79    | 3.18    |
| Woman                          | 2506            | 5.67    | 3.50    |
| NeutralMale                    | 2493            | 4.82    | 3.34    |
| <i>Experiment 2: Scene</i>     |                 |         |         |
| Field                          | 5711            | 6.62    | 3.03    |
| Store                          | 7495            | 5.90    | 3.82    |
| Traffic                        | 7595            | 4.55    | 3.77    |
| Bed                            | 7710            | 5.42    | 3.44    |
| IroningBoard                   | 7234            | 4.23    | 2.96    |

**Supplementary Table 4. SCR Monte Carlo Simulations**

| Sample Length | $\lambda\rho$ (msec) | Number of Simulations | Probability | Cumulative Probability |
|---------------|----------------------|-----------------------|-------------|------------------------|
| 1             | 0.0050               | 0                     | 0.000000    | 0.0000                 |
| 2             | 0.0100               | 1728                  | 0.008640    | 0.0086                 |
| 3             | 0.0150               | 156020                | 0.780100    | 0.7887                 |
| 4             | 0.0200               | 39846                 | 0.199230    | 0.9879                 |
| 5             | 0.0250               | 2275                  | 0.011375    | 0.9993                 |
| 6             | 0.0300               | 127                   | 0.000635    | 0.9999                 |
| 7             | 0.0350               | 4                     | 0.00002     | 1.0000                 |
| 8             | 0.0400               | 0                     | 0.000000    | 1.0000                 |

**Supplementary Table 5. SCR ANOVA Effects**

| Effects                           | Mean* |          | Sample Length**<br>(samples) | Onset** | Offset**  |
|-----------------------------------|-------|----------|------------------------------|---------|-----------|
|                                   | TF    | DF       |                              |         |           |
| <i>Experiment 1: Main Effects</i> |       |          |                              |         |           |
| Novelty                           | 7.45  | (1, 396) | 3.60 (729)                   | 3.51    | 7.15      |
| Emotion                           | 12.34 | (1, 396) | 3.80 (765)                   | 4.18    | Trial End |
| <i>Experiment 1: Interaction</i>  |       |          |                              |         |           |
| NOV x EM                          | 8.09  | (1, 396) | 4.32 (864)                   | 3.68    | Trial End |
| <i>Experiment 2: Main Effects</i> |       |          |                              |         |           |
| Novelty                           | 14.39 | (1, 396) | 5.23 (1048)                  | 2.77    | Trial End |
| Human                             | --    | --       | --                           | --      | --        |
| <i>Experiment 2: Interaction</i>  |       |          |                              |         |           |
| NOV x HUM                         | --    | --       | --                           | --      | --        |

\*Mean *F*-value for timepoints occurring during sample.

\*\*Time in seconds.

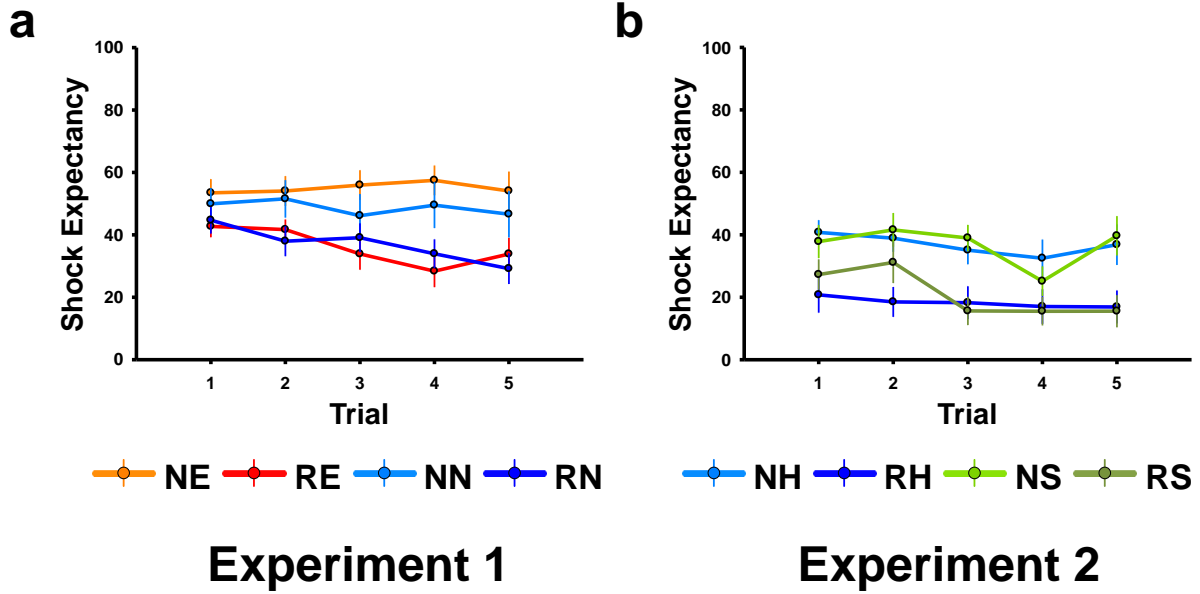

**Supplementary Figure 1. Participants were asked to rate their expectancy of receiving an electrical stimulation.** Graphs depict mean $\pm$ SEM shock expectancy Experiment 1 (a) and Experiment 2 (b). Values on the X-axis represent the trial number. Values on the Y-axis represent how likely the participant thinks they will receive a shock in the near future. In Experiment 1 (a) we observed an emotion by trial interaction. In Experiment 2 (b) we observed a novelty main effect and a trial main effect. (a: NE = novel emotional, RE = repeated emotional, NN = novel neutral, RN = repeated neutral; b: NH = novel human, RH = repeated human, NS = novel scene, RS = repeated scene).

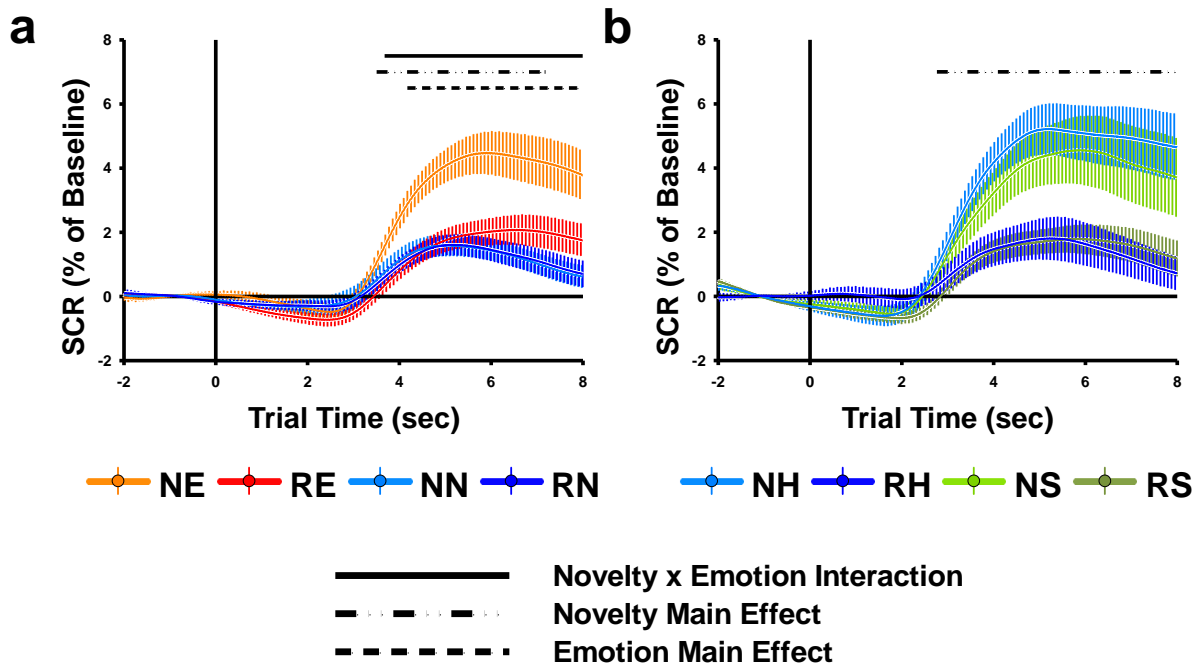

## Experiment 1

## Experiment 2

**Supplementary Figure 2. Novel emotional images in Experiment 1 drive SCR expression; whereas novel humans and novel scenes drive SCR expression in Experiment 2.** Graphs depict mean $\pm$ SEM SCR timecourse evoked by each of our stimuli for Experiment 1 (**a**) and Experiment 2 (**b**). X-axis shows a 10 second time window that includes the 8 second trial and a 2 second baseline. Values are expressed as a percent change from baseline. Vertical line indicates the onset of the stimulus period. Horizontal line indicates baseline SCL. ANOVAs were carried out at each timepoint. Lines at the top of the graphs indicate periods of time where significant effects were observed. (**a**: NE = novel emotional, RE = repeated emotional, NN = novel neutral, RN = repeated neutral; **b**: NH = novel human, RH = repeated human, NS = novel scene, RS = repeated scene).
